# Supplementary material
Source: publisher figshare collection journal article supplement (https://sage.figshare.com/ndownloader/files/23235248)
Supplement: Supplementary file 1 [file 23235248]

## **Appendix A**

### **Interview Guide**

#### **Heart Failure Interview Guide (*Adapted from OpenLab's Innovate A-Fib Interview Guide*)**

---

1. How would you describe your interests in heart failure? Examples: clinical, administrative or other. Please explain in terms that a non-specialist can understand.
  2. (For clinician) Does the assessment of multiple comorbidities or frailty add any value to your day-to-day clinical practice caring for patients with heart failure?
  3. (For clinician) Can you help us understand how heart failure patients with multiple comorbidities “flow” through your care? Who do patients see before you? Who do patients see after you?
  4. What are the biggest problems currently faced by patients with heart failure and multiple comorbidities?
  5. What are the biggest challenges currently faced by clinicians looking after heart failure patients with multiple comorbidities?
  6. Do you know of other models (North America or Europe) that provide alternative methods for caring for patients with heart failure and multiple comorbidities? Explain how they differ from current model.
  7. What would an ideal system look like? How would it differ from the current system?
  8. The final phase of our project involves setting up a system by which frailty and comorbidities are assessed in patients with heart failure. These assessments will allow us to optimize delivery of care by targeting high-risk patients. What challenges do you anticipate we may face in trying to implement this model?
  9. What important issues have we missed?
  10. If you could recommend one change to improve care of heart failure patients with multiple comorbidities, what would it be?
-
